# Supplementary material
Source: HighWire-hosted journal article supplement (https://informatics.bmj.com/content/31/1/e100759)
Supplement: inline-supplementary-material-4 [file inline-supplementary-material-4.pdf]

**Supplementary Appendix 4**

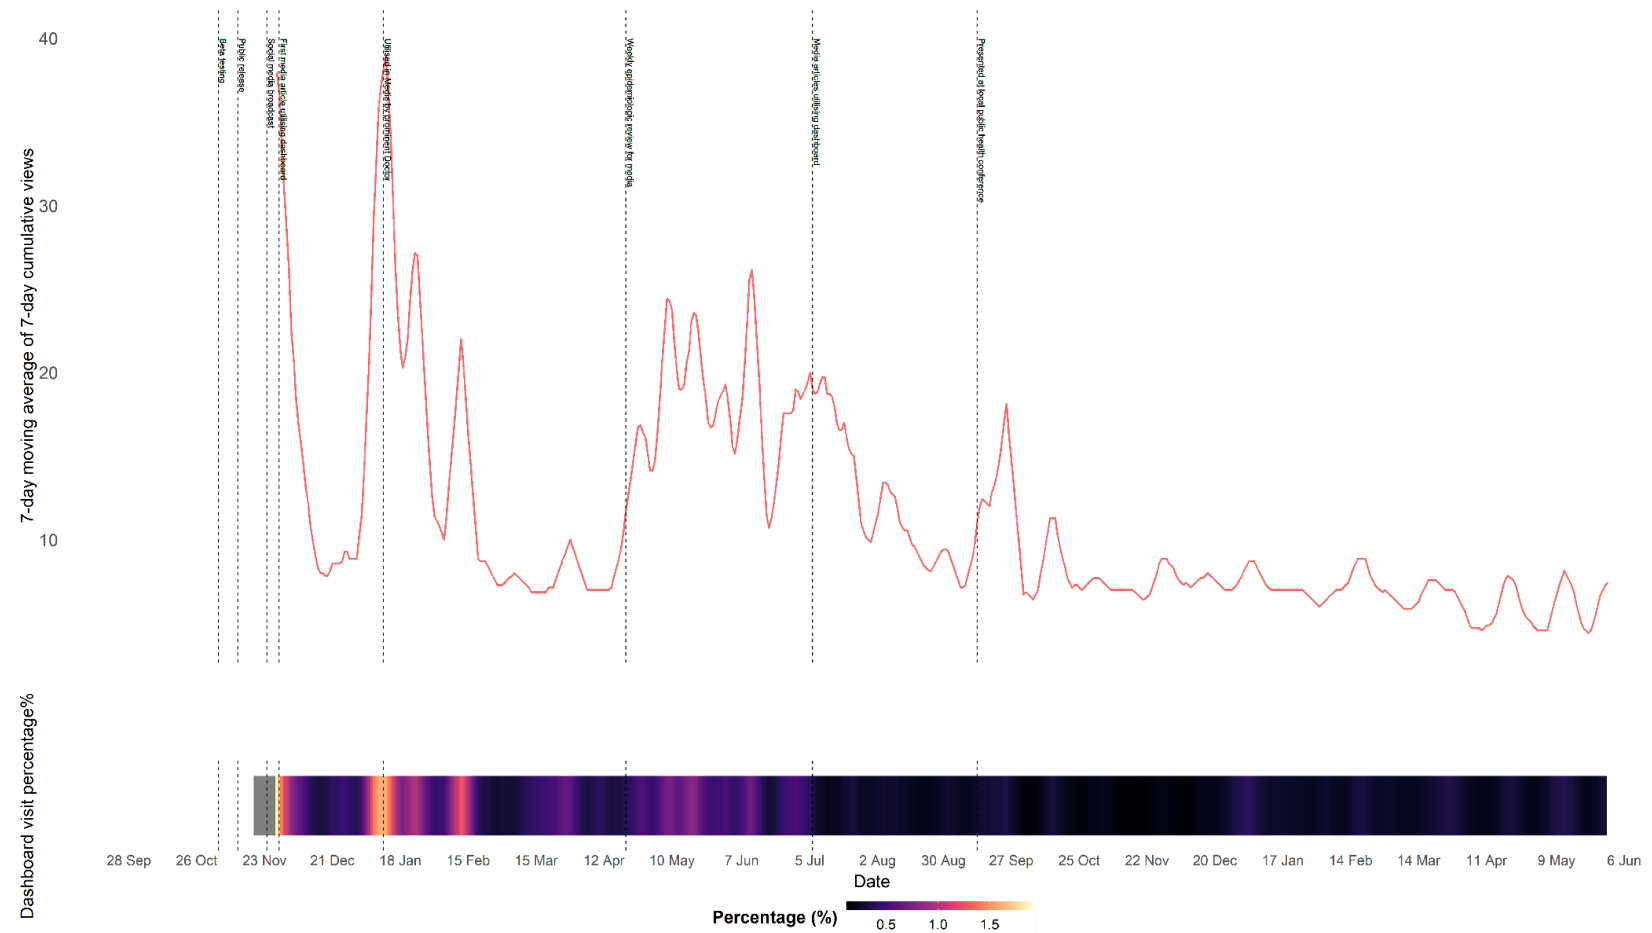

Supplementary figure 2 Number of 7-day moving average of 7-day cumulative views of dashboard between 1 October 2020-30 September 2021
